1 Parallel signatures of mammalian domestication and human industrialization in the gut  
2 microbiota

3  
4 Aspen T. Reese<sup>1,2\*</sup>, Katia S. Chadaideh<sup>1</sup>, Caroline E. Diggins<sup>1</sup>, Mark Beckel<sup>3</sup>, Peggy Callahan<sup>3</sup>,  
5 Roberta Ryan<sup>3</sup>, Melissa Emery Thompson<sup>4</sup>, Rachel N. Carmody<sup>1\*</sup>

6  
7 <sup>1</sup> Department of Human Evolutionary Biology, Harvard University, 11 Divinity Avenue,  
8 Cambridge, MA 02138, USA

9 <sup>2</sup> Society of Fellows, Harvard University, 78 Mount Auburn Street, Cambridge, MA 02138, USA

10 <sup>3</sup> Wildlife Science Center, 22830 Sunrise Road NE, Stacy, MN 55079, USA

11 <sup>4</sup> Department of Anthropology, University of New Mexico, MSC01-1040, Albuquerque, NM  
12 87131, USA

13  
14 \*Corresponding authors. Email: [areese@fas.harvard.edu](mailto:areese@fas.harvard.edu), [carmody@fas.harvard.edu](mailto:carmody@fas.harvard.edu)

15       **Abstract:** Domestication may have had convergent effects on the microbiota of domesticates and  
16       humans through analogous ecological shifts. Comparing the gut microbiota of domestic and related  
17       wild mammals plus humans and chimpanzees, we found consistent shifts in composition in  
18       domestic animals and in humans from industrialized but not traditional societies. Reciprocal diet  
19       switches in mice and canids demonstrated that diet played a dominant role in shaping the domestic  
20       gut microbiota, with stronger responses in the member of the wild-domestic pair with higher  
21       dietary and microbial diversity. Laboratory mice recovered wild-like microbial diversity and  
22       responsiveness with experimental colonization. We conclude that domestication and  
23       industrialization have similarly impacted the gut microbiota, emphasizing the utility of domestic  
24       animal models and diets for understanding host-microbial interactions in rapidly changing  
25       environments.

26 Changes in industrialized human lifestyles have resulted in large shifts in the gut  
27 microbiota relative to traditional populations or closely related primates, including reductions in  
28 alpha-diversity and changes in composition (1-4) that have been implicated in the rise of various  
29 metabolic and immunological diseases (5-7). Ecological differences between industrialized  
30 humans and chimpanzees, and to a lesser extent between industrialized and non-industrialized  
31 human populations, resemble those between domestic and wild animals, including shifts toward  
32 non-seasonal calorically-dense diets, reduced physical activity, variations in movement and  
33 density, changes in pathogen exposure and antibiotic use, and altered reproductive patterns (8).  
34 Furthermore, the evolution of *Homo sapiens* has been argued to reflect self-domestication arising  
35 due to selection for reduced social aggression (9). Despite these parallels, the global effects of  
36 domestication on the gut microbiota and its relationship to the effects of human industrialization  
37 remain unclear.

38 Notably, many of the altered ecological features experienced by domesticated animals and  
39 industrialized humans have been independently observed to impact the gut microbiota, including  
40 diet (10, 11) physical activity (12, 13), the size and nature of social networks (14, 15), antibiotic  
41 use (16, 17), and changes in birthing and lactation practices (16, 18). This overlap leads to the  
42 predictions that (i) gut microbial communities will differ between domestic animals and their wild  
43 counterparts, (ii) gut microbial communities of diverse domestic animals may exhibit convergent  
44 characteristics in a microbial counterpart to the physiological domestication syndrome (19), and  
45 (iii) gut microbial changes observed with domestication may parallel contrasts observed between  
46 chimpanzees and industrialized humans. In addition, to the extent that domestication effects are  
47 driven by ecology rather than host genotype, we should expect (iv) humans in traditional and  
48 industrialized societies will differ, and (v) experimental control of environmental variables should  
49 be able to overcome differences in the gut microbiota between closely related hosts.

50 Here, we evaluate these predictions by reporting the effects of domestication on the  
51 mammalian gut microbiota, comparing these effects to those of human industrialization, and  
52 exploring the genetic and ecological forces driving these patterns. First, we characterized the fecal  
53 microbiota of wild and domestic populations of nine pairs of artiodactyl, carnivore, lagomorph,  
54 and rodent species (Fig. 1A) using 16S rRNA gene amplicon sequencing and qPCR. We found  
55 consistent effects of domestication status on gut microbiota composition, despite observing no  
56 single convergent profile. Domestication status contributed significantly to variation in microbial  
57 communities ( $P < 0.001$ ,  $R^2 = 0.16$ , PERMANOVA), although the largest single factor was host pair  
58 (e.g., pig/boar;  $P < 0.001$ ,  $R^2 = 0.39$ ; Fig. 1B). Diet and digestive physiology were also determinants  
59 ( $P < 0.001$ ,  $R^2 = 0.11$  diet,  $R^2 = 0.14$  physiology; Fig. S1), as seen in other surveys of mammals (20),  
60 with effect sizes comparable to that of domestication status. Consistent with the idea that higher  
61 ecological homogeneity may lead to more similar gut microbial communities in domesticates, we  
62 found there was greater between-animal variability in wild gut communities than in domesticates  
63 ( $P = 0.005$ ,  $F = 8.833$ ; permutation test for F).

64 To determine whether there was a consistent shift in microbial composition with  
65 domestication, we calculated the difference between an individual's ordination coordinates and  
66 the average of its host pair along the first and second NMDS axis. Domestic individuals were  
67 typically further right (axis 1:  $P < 0.001$ , Mann-Whitney U test; Fig. 1C) and further up (axis 2:  
68  $P = 0.007$ ; Fig. 1D) relative to the average of their host pair. Domestic species all displayed these  
69 shifts, whether classified as laboratory, agricultural, or companion animals ( $P < 0.05$ , Mann-  
70 Whitney U tests; Fig. 1A, S2).

71 Microbial density quantified as copies of the 16S rRNA gene per gram of feces ( $P = 0.089$ ,  
72 Mann-Whitney U test), OTU richness ( $P = 0.800$ ), and Shannon index ( $P = 0.200$ ; Fig. S3) did not  
73 differ based on domestication status, indicating that the domestication signal overall is not

74 primarily driven by species loss. By contrast, we observed changes in the abundances of certain  
75 microbial taxa. Across host taxa, domestication was associated with higher abundances of the  
76 phyla Bacteroidetes ( $P=0.023$ , Bonferroni-corrected Mann-Whitney U test; Fig. 1E, S3) and  
77 Verrucomicrobia ( $P=0.001$ ; Fig. S3). These phyla are known to be overrepresented in  
78 industrialized compared with traditional human populations (4). Consistent with heightened  
79 environmental exposure, wild animals generally had more diverse ( $P=0.001$ , Mann-Whitney U  
80 test) and marginally more abundant ( $P=0.092$ ; Fig. S3) communities of microbes recognized as  
81 potential human pathogens. Among laboratory animals specifically, microbial richness ( $P=0.045$ ,  
82 Mann-Whitney U test), potential pathogen abundance ( $P<0.001$ ), and pathogen richness ( $P<0.001$ )  
83 were all substantially lower than among wild relatives, while total microbial load was higher  
84 ( $P=0.006$ ; Fig. S2). Agricultural animals had higher Shannon index values ( $P=0.001$ , Mann-  
85 Whitney U test) and marginally higher pathogen abundances ( $P=0.067$ ; Fig. S2) compared with  
86 their wild counterparts. By contrast, companion animals did not differ significantly by  
87 domestication status for microbial load, diversity, or pathogen metrics. The elevated pathogen  
88 abundances found in wild populations overall may largely be ascribed to differences in laboratory  
89 animals, which are maintained under conditions that minimize the likelihood of infection. Under  
90 natural conditions, however, the domestic microbiota may exhibit reduced colonization resistance  
91 or immune system functioning (21, 22), resulting in higher pathogen colonization, as observed in  
92 agricultural animals.

93           Given the hypothesis that *Homo sapiens* has undergone a process of self-domestication (9,  
94 19), we next tested whether the gut microbial communities of industrialized humans and  
95 chimpanzees exhibit parallel shifts to those observed between domestic animals and their wild  
96 counterparts when compared in the same ordination space. Indeed, this is what we found ( $P<0.001$ ,  
97 Mann-Whitney U tests; Fig. 1C, 1D). Microbial load ( $P=0.002$ , Mann-Whitney U test) and

98 Shannon index ( $P=0.018$ ; Fig. S3) also differed between industrialized humans and chimpanzees,  
99 with industrialized humans harboring microbial communities with substantially lower alpha-  
100 diversity. Consistent with the greater evolutionary and profound ecological distance between  
101 humans and chimpanzees (2), the magnitude of the microbial difference between industrialized  
102 humans and chimpanzees exceeded that observed for other animal pairs. To estimate the  
103 divergence attributable to ecology versus host genotype, we proceeded to compare the gut  
104 microbial communities of humans living in industrialized versus traditional societies. Reanalysis  
105 of our cross-species comparison to include published data on human populations in rural Malawi  
106 and Venezuela (23) (see *Methods*) found that the gut microbial communities of these traditional  
107 populations differed substantially from those of two independent U.S. samples, clustering more  
108 closely to those of chimpanzees (Fig. S4). These data indicate that the human gut microbiota does  
109 not carry a global signal of domestication, as would be predicted under the human self-  
110 domestication hypothesis. Rather, they suggest that gut microbial responses to domestication and  
111 industrialization are more likely driven by common ecological factors, a conclusion further  
112 supported by the observation that domestic animals were significantly more similar to those of  
113 industrialized humans than their wild animal counterparts ( $P=0.002$ , Mann-Whitney U test).  
114 Notably, the gut microbial communities of domestic animals and industrialized humans most  
115 closely resembled one another for companion and laboratory animals ( $P<0.001$ , Kruskal-Wallis  
116 test; Fig. S2), presumably reflecting their greater degree of overlap in ecological variables and  
117 physical contact (24).

118 Importantly, the observation that gut microbial divergence is restricted to industrialized  
119 populations implicates recent ecological changes as opposed to ecological changes with deeper  
120 roots in human evolution. Many recent ecological changes involve accelerations of basic patterns  
121 established during the evolution of *Homo*, including increased proportion of calories from fat and

122 protein, increased dependence on animal source foods, and extensive food processing by thermal  
123 and non-thermal means (25). Other ecological changes are likely specific to industrialization,  
124 including reduced physical activity and antibiotic use. Further work will be required to illuminate  
125 the combination of ecological factors driving similarities between the domesticated and  
126 industrialized microbial profiles.

127 To begin to tease apart these ecological drivers, we performed a series of reciprocal diet  
128 experiments that tested the extent to which gut microbial signatures of domestic-wild pairs could  
129 be recapitulated and reversed solely by the administration of domestic versus wild diets. We first  
130 conducted a fully factorial experiment in which wild-caught and laboratory mice (*Mus musculus*)  
131 were maintained for 28 days on wild or domestic diets (Fig. 2A, Table S1). Overall, we found that  
132 host genotype explained the largest amount of variation in composition ( $P < 0.001$ ,  $R^2 = 0.173$ ,  
133 PERMANOVA), but diet ( $P < 0.001$ ,  $R^2 = 0.042$ ) and a genotype by diet interaction term ( $P < 0.001$ ,  
134  $R^2 = 0.020$ ) were also significant (Fig. 2B, S5). Experimental groups varied in their microbial  
135 responsiveness over the course of the experiment (axis 1:  $P = 0.063$ , axis 2:  $P < 0.001$ , Kruskal-  
136 Wallis tests; Fig. 2C, S5). Generally, the microbiota of Wild<sub>G</sub>/Dom<sub>D</sub> mice moved toward the  
137 Dom<sub>G</sub>/Dom<sub>D</sub> mouse average community, the Dom<sub>G</sub>/Wild<sub>D</sub> microbiota moved in the opposite  
138 direction, and those of Wild<sub>G</sub>/Wild<sub>D</sub> and Dom<sub>G</sub>/Dom<sub>D</sub> mice did not shift (Fig. 2B). Over the course  
139 of the experiment, Shannon index values also changed significantly across treatment groups  
140 ( $P = 0.005$ , Kruskal-Wallis test), with Dom<sub>G</sub>/Wild<sub>D</sub> mice becoming significantly more diverse  
141 ( $P = 0.002$ , one-sample Wilcoxon test) despite initial differences in alpha-diversity between wild  
142 and domestic mice ( $P = 0.009$ , Mann Whitney U test; Fig. S6).

143 Neither diet nor host genotype were associated with differences in microbial density over  
144 the experiment ( $P = 0.272$ , Kruskal-Wallis test; Fig. S6), but it is notable that the total amount of  
145 feces produced, and thus likely the total number of bacteria, was lower in each host genotype when

146 fed wild diet ( $P < 0.001$ , Kruskal-Wallis test; Fig. S6). Despite similar trends in fecal production  
147 between the experimental groups, energy harvest responses differed markedly between  
148 experimental groups ( $P < 0.001$ , Kruskal-Wallis test; Fig. S6). While wild mice were equally  
149 efficient consumers of both diets, laboratory mice captured 15% fewer calories when consuming  
150 the wild versus domestic diet. Nonetheless, weight gain in laboratory mice did not differ between  
151 diet groups, while Wild<sub>G</sub>/Dom<sub>D</sub> mice tended to gain weight over the course of the experiment  
152 ( $P = 0.250$ , one-sample Wilcoxon test; Fig. S6). Interestingly, the asymmetry in energy harvest  
153 between genotypes was also reflected in differential microbial responses to reciprocal diets.  
154 Whereas the microbial communities of Wild<sub>G</sub>/Dom<sub>D</sub> mice eventually largely recapitulated those  
155 of untreated Dom<sub>G</sub> mice, the microbial communities of Dom<sub>G</sub>/Wild<sub>D</sub> mice remained distinct from  
156 untreated Wild<sub>G</sub> mice throughout the experiment ( $P = 0.042$ , Mann-Whitney U test; Fig. 2B). The  
157 inability to foster a wild-type microbiota may underpin the reduced digestive efficiency of the  
158 Dom<sub>G</sub>/Wild<sub>D</sub> mice.

159 We hypothesized that these asymmetries were due to past extinction of relevant strains  
160 from laboratory microbial communities and no dispersal source of replacement strains (26).  
161 Therefore, we tested whether experimental dispersal from a wild microbial community in  
162 conjunction with feeding a wild diet could support a fully wild microbial community in laboratory  
163 mice (Fig. 3A). A single colonization treatment with a wild mouse cecal community (via gavage)  
164 led to significant shifts in the microbial community (Fig. 3B, S7), resulting in closer resemblance  
165 to the wild donor ( $P < 0.001$ , Mann-Whitney U test; Fig. 3C). While laboratory mice fed a wild diet  
166 but given a control gavage (PBS) also moved toward the donor along NMDS axis 1 ( $P = 0.002$ , one-  
167 sample Wilcoxon test; Fig. 3D), reflecting the influence of diet, the magnitude of the shift  
168 following the experimental colonization was substantially greater ( $P < 0.001$ , Kruskal-Wallis test).  
169 There were no apparent differences in these shifts based on diet treatment among colonized mice



170 (P=0.182, Mann-Whitney U test). Colonization with a wild community led to an increase in alpha-  
171 diversity as measured by the Shannon index (P=0.042, Kruskal-Wallis test), and wild diet  
172 treatment led to reductions in fecal production (P<0.001; Fig. S7). Although all mice exhibited an  
173 increase in load over the course of the experiment (P<0.05, one-sample Wilcoxon tests),  
174 colonization with a wild community did not lead to higher loads overall (P=0.742, Kruskal-Wallis  
175 test; Fig. S7). This result suggests that differences observed with treatment reflected shifts in gut  
176 microbial community structure rather than simple augmentation.

177 To test if these findings were generalizable to non-laboratory animals, we conducted an  
178 analogous reciprocal diet experiment in a captive sympatric population of wolves and dogs (Fig.  
179 4A). We tracked gut microbial dynamics in these canids for one week on their standard diet (raw  
180 carcasses or commercial dog food, respectively) and one week on the reciprocal diet. As in the  
181 mouse experiment, we found that host genotype explained the largest amount of variation in gut  
182 microbiota composition (P<0.001, R<sup>2</sup>=0.098, PERMANOVA), but diet (P<0.001, R<sup>2</sup>=0.058) and  
183 a genotype by diet interaction term (P<0.001, R<sup>2</sup>=0.028) were also significant (Fig. 4B, S8). There  
184 were significant differences between experimental groups in the magnitude of their shifts along  
185 the first (P<0.001, Kruskal-Wallis test; Fig. 4C) and second (P=0.045; Fig. S8) NMDS axes over  
186 the experimental periods. As in the mouse experiments, we observed animals on reciprocal diet  
187 treatments moved significantly toward the diet control of the other species (P<0.05, one-sample  
188 Wilcoxon tests; Fig. 4B), while the control animals did not shift predictably (P>0.100).

189 Again, we observed an asymmetry in the degree of microbial composition change between  
190 domestic and wild animals. On experimental diets, dogs and wolves differed significantly in their  
191 dissimilarity to diet controls (P<0.001, Kruskal-Wallis test, Fig. 4D), with the gut microbial  
192 communities of dogs fed raw carcasses resembling those of wolves at baseline but the gut  
193 microbial communities of wolves fed dog food remaining distinct from those of dogs at baseline

194 (P=0.001, Mann-Whitney U test). The difference in the direction of asymmetry between the mouse  
195 and canid experiments may be explained by the different trends in the diet ecology between  
196 omnivores and carnivores during domestication. Carnivores, through the addition of extensive  
197 carbohydrates to their diet (27), likely encounter more diverse diets in captivity than in the wild,  
198 whereas herbivores and omnivores eat a smaller number of plant species or even just a single feed  
199 mix. Supporting this, we found dogs initially had significantly higher OTU richness (P<0.001) and  
200 Shannon index (P=0.003) than wolves (Fig. S9), but that reciprocal diets led to a switch in diversity  
201 (richness: P=0.014, Shannon index: P=0.027, Mann-Whitney U tests), with wolves becoming more  
202 diverse on dog food while dogs lost diversity on raw carcasses (Fig. 4E).

203 Our reciprocal diet experiments in mice and canids confirm that ecology plays a  
204 predominant role in shaping the domestic gut microbiota. Moreover, that the effects of a single  
205 ecological variable like diet were sufficiently profound to outweigh those of host genotype  
206 suggests that suites of ecological variables changing together, such as during domestication or  
207 industrialization, may have collectively exerted an even larger influence. However, microbiota  
208 changes were certainly not the only pathway for domesticating animals to respond to changing  
209 ecological factors. For example, in dogs, genetic changes have enhanced starch digestion (27). The  
210 increased microbial diversity and shifts in microbial composition that we observed in dogs may  
211 likewise contribute to carbohydrate digestion and may have been particularly important early in  
212 domestication, before host evolution occurred, although that hypothesis remains to be tested.  
213 Notably, the microbiota has been found to supplement evolutionary responses during dietary niche  
214 expansion in wild animals that consume plants high in toxins (28). As such, the changes observed  
215 in domestic animals are not necessarily maladaptive, as the industrialized human microbiome is  
216 often characterized to be (29). Beyond host support of microbiota that can better digest a domestic  
217 diet, humans may have selected for animals harboring a microbiota that helped them grow and

218 reproduce well on such diets. Specialization for microbial performance domestic diets may have  
219 come at the cost of broader digestive capacity, as seen in the domestic mouse microbiota, which  
220 was better at harvesting energy from domestic diets than from wild diets (Fig. S6). Future studies  
221 examining the trade-offs between microbially-mediated functions, like digestive capacity,  
222 reproduction, and immunity, will help to illuminate the complex selection pressures shaping the  
223 domestic holobiont.

224 Taken together, our data reveal strong parallels between the gut microbial signatures of  
225 domestication and industrialization, most likely driven by convergent changes in ecology,  
226 including diet. Because laboratory mice demonstrate some of the largest overall differences  
227 relative to their wild counterparts, and in part emulate the variation observed between  
228 industrialized humans and closely related primates, their translational potential as models for  
229 studying the gut microbiota of industrialized populations may be greater than currently  
230 appreciated. However, our data also suggest that laboratory animals may not be broadly  
231 representative of natural host-microbe interactions or their evolutionary history (30). Nevertheless,  
232 that laboratory mice were permissive of recolonization by wild strains indicates that the local  
233 extinctions that occurred during domestication and/or generations in captivity can potentially be  
234 mitigated. Previous work has relied on germfree mice colonized with a wild microbiota but fed  
235 standard laboratory chow (21). A combination of these approaches— adding wild community  
236 members and feeding wild diet—would be expected to best support a wild microbiota in laboratory  
237 mice. A wild-microbiota laboratory-genotype model could be especially useful for studying  
238 infection challenges, disentangling host gene versus microbiota contributions to disease  
239 phenotypes, and testing for coevolution between host and microbes.

240 More generally, our data add to growing evidence that the gut microbiota is finely tuned to  
241 variations in the environment, affording at once an opportunity for host-microbial mismatch and

242 an opportunity for rapid microbiota-mediated host adaptation to novel environments (31). Further  
243 work to characterize the ecological significance of gut microbial plasticity will help reveal the  
244 fundamental nature of the host-microbial relationship, the conditions under which plasticity is  
245 beneficial versus detrimental, and the ecological conditions promoting cooperative, commensal,  
246 and competitive dynamics.

## 247 **Materials and Methods**

### 248 Fecal sample collection

249 Gut microbiota samples from a range of non-human species were collected by authors or  
250 collaborators primarily from feces. Fecal samples from non-human mammals were collected from  
251 the ground within seconds to hours of production. In the case of artiodactyl, carnivore, lagomorph,  
252 and rodent feces, this approach precluded the need for institutional approval. Chimpanzee fecal  
253 samples were collected under the approval of the UNM IACUC (Protocol 18-200739-MC) and  
254 with permission of the Uganda Wildlife Authority and Uganda National Council for Science and  
255 Technology. Human samples were self-collected by healthy study participants after providing  
256 written informed consent under the approval of the Harvard University IRB (Protocol 17-1016).  
257 All samples were flash-frozen or preserved in ethanol prior to permanent storage at -80°C.

258

### 259 *Domestic animals*

260 Domestic sheep (*Ovis aries*; N=11, 10 female), cattle (*Bos taurus*; N=10, sex unknown), and pig  
261 (*Sus scrofa domesticus*; N=9, sex unknown) fecal samples were collected from a farm in Vershire,  
262 Vermont. Domestic alpaca (*Vicugna pacos*; N=8, sex unknown) and domestic sheep (*Ovis aries*;  
263 N=2, 2 female), fecal samples were collected from a farm in Groton, Massachusetts. Domestic  
264 rabbit (*Oryctolagus cuniculus*; N=11, 4 female) fecal samples were collected from a shelter in  
265 Billerica, Massachusetts. Mouse (*Mus musculus*, N=9, 0 female), rat (*Rattus norvegicus*; N=6, sex

266 unknown), and guinea pig (*Cavia porcellus*; N=10, 0 female) fecal samples were collected from  
267 animals in Harvard laboratory facilities. Dog (*Canis lupus familiaris*; N=7, 4 female) fecal samples  
268 were collected from personal pets in Stacy, Minnesota.

269

#### 270 *Wild animals*

271 Wild boar (*Sus scrofa*; N=16, 5 female) fecal samples were collected from adults and juveniles in  
272 southeastern Alabama during fall 2017. Rat (*Rattus norvegicus*; N=10, 3 female) gut samples from  
273 adults and juveniles were collected directly from the colon shortly following trapping in New York  
274 City between February and May 2017 (32). Bison (*Bison bison*, N=20, sex unknown) fecal samples  
275 were collected from a semi-free-ranging population in Elk Island National Park, Alberta, Canada  
276 (33). Wild house mouse (*Mus musculus*, N=9, sex unknown) fecal samples were collected from  
277 live-trapped animals in the Boston, Massachusetts area during winter 2018. Pursuant to  
278 Massachusetts state law, permits were not necessary to trap animals indoors. Wild European rabbit  
279 (*Oryctolagus cuniculus*; N=12, sex unknown) fecal samples were collected in Mértola, Portugal  
280 during spring 2018. Bighorn sheep (*Ovis canadensis*; N=10, sex unknown) fecal samples were  
281 collected during 2017 and 2018 in Wyoming. Vicuña (*Vicugna vicugna*; N=4, 2 female) fecal  
282 samples were collected during spring 2018 from a captive population in Santiago, Chile that was  
283 free-grazing but supplemented with hay. Wild guinea pig (*Cavia tschudii*, N=11, sex unknown)  
284 fecal samples were collected at a facility in Lima, Peru during spring 2018. Wolf (*Canis lupus*;  
285 N=9, sex unknown) fecal samples were collected during fall 2017 from captive packs at the  
286 Wildlife Science Center in Stacy, Minnesota fed an exclusively raw diet. Wild chimpanzee (*Pan  
287 troglodytes schweinfurthii*, N=7, 7 female) fecal samples were collected between September 2015  
288 and January 2016 from adult members of the Kanyawara community in Kibale, Uganda.

289

290 *Human*

291 Fecal samples were collected from healthy adult humans (N=7, 5 female) residing in the  
292 Cambridge, Massachusetts area. All participants were provided with sterile study kits, and self-  
293 collected fecal samples during the same 3-day period in December 2017. During this period,  
294 participants freely consumed their habitual diets. Fecal samples were immediately stored at -20°C  
295 and were transferred within 24 hours to permanent storage at -80°C.

296

297 *Human sample meta-analysis*

298 To compare the microbial differences between wild and domestic animals or US humans and  
299 chimpanzees with other human populations, we also performed analyses including all of the  
300 samples outlined above and a subset of published data from Yatsunenko and colleagues (23). We  
301 subsampled 7 adult females from their Malawian, Venezuelan, and American populations,  
302 downloading the data from MG-RAST. All sequences were trimmed to 100 bp before analysis (see  
303 16S rRNA gene analysis below), and the published dataset was rarefied to 100,000 reads per  
304 sample to ensure comparable sequencing depth with our data.

305

306 *Animal experiments*

307 *Wild mouse capture*

308 *Mus musculus* were introduced to North America from Western Europe and are now commonly  
309 found in commensal settings (34). We set out Sherman live traps in the evenings in buildings and  
310 barns during February 2018. Traps were baited with peanut butter and a chunk of fruit and outfitted  
311 with sufficient bedding and food to sustain an adult mouse for at least 48 hr. They were checked  
312 the following morning to minimize time spent in the traps. Rodents were immediately transferred  
313 from their traps to a plastic bag, and unwanted rodent species were released immediately. Mice

314 that were identified as *Mus musculus* (rather than *Peromyscus spp.*, also common in  
315 Massachusetts) were transferred to temporary cages for transport to lab facilities. At time of  
316 capture, we collected fecal samples and body swabs for zoonoses testing by Charles River. The  
317 only agent of concern found was fur mites. Because animals were not treated for parasites or  
318 pathogens in order to increase maintenance of the wild-state microbiota, they were housed under  
319 non-SPF conditions at Harvard's Concord Field Station. Mice were allowed at least three days to  
320 adjust to laboratory conditions without handling and provided with a wild mouse diet [a mix of  
321 bird seed (Wagner's Eastern Regional Blend Deluxe Wild Bird Food) and freeze-dried mealworms;  
322 Table S1] before the beginning of the experiment. All mice were housed singly from the time of  
323 arrival at the Concord Field Station and had access to water and food ad libitum.

324

#### 325 *Wild/laboratory mice reciprocal diet experiment*

326 A total of 10 wild mice were captured for this experiment. Of these, 2 were deemed too young for  
327 inclusion in the study, 1 died before beginning the experiment, and 1 died during the course of the  
328 experiment. As a result, we collected 6 wild mice (Wild<sub>G</sub>) that were included in the full study. In  
329 addition to the wild mice, male C57BL/6 mice 10-12 weeks of age with a conventional microbiota  
330 were purchased from Charles River Laboratories for inclusion in the study (Dom<sub>G</sub>). All mouse  
331 experiments were conducted in accordance with the National Institutes of Health Guide for the  
332 Care and Use of Laboratory Animals using protocols approved by the Harvard University  
333 Institutional Animal Care & Use Committee (protocol number 17-11-315). All mice were housed  
334 singly from the time of arrival at the Concord Field Station and had access to water and food ad  
335 libitum. Mice were provided nesting material and plastic enrichment housing atop corncob  
336 bedding. The mice were maintained in a room with natural light cycles kept at 20-22°C.

337

338 Mice, both wild and laboratory, were randomly assigned to one of two dietary treatment groups  
339 (N=10 laboratory mice or 3 wild mice per group). The first group (domestic diet: Dom<sub>D</sub>) was  
340 provided *ad libitum* mouse chow (Prolab Isopro RMH 3000) in hanging food hoppers, as is  
341 standard in mouse studies. The second group (wild diet: Wild<sub>D</sub>) was provided a mix of bird seed  
342 (Wagner's Eastern Regional Blend Deluxe Wild Bird Food) and freeze-dried mealworms (Table  
343 S1) in excess of predicted consumption. The food was placed in the corncob bedding to simulate  
344 foraging.

345  
346 Before initiating the dietary interventions, all individuals were weighed and multiple fecal samples  
347 were collected. The mice were then returned to a new, clean cage with the treatment diet present.  
348 Over the next week, fecal samples and weights were collected daily for each mouse. The amount  
349 of food remaining was weighed and additional wild diet was added daily. One week after beginning  
350 the experiment, mice were weighed and fecal samples collected then mice were moved to clean  
351 cages. Weights and fecal samples were henceforth collected weekly (day 14, 21, 28) until the end  
352 of the experiment, although additional food was added biweekly for individuals assigned to the  
353 wild diet treatment. Additional chow was added to hoppers for individuals assigned to the  
354 conventional diet treatment, and all water bottles were refilled as necessary. At the end of each  
355 week, cage bedding was collected and sifted to quantify uneaten food (Wild<sub>D</sub>) and total weekly  
356 fecal production (all groups during week 3), as well as to provide fecal samples for bomb  
357 calorimetry (6050 Calorimeter, Parr). All calorimetry results were adjusted for the average weekly  
358 fecal production and average weekly food intake of each experimental group. At the end of the  
359 experiment (day 28-30), mice were humanely sacrificed via CO<sub>2</sub> euthanasia.

360

361 *Wild/laboratory mice gavage experiment*



362 Thirty 10 week old male C57BL/6 mice with a native microbiota were purchased from Charles  
363 River Laboratories for inclusion in the study. Mice were cohoused in litter groups of 3-4 until  
364 beginning the study. Cage groups were spread across the treatment groups, with individuals  
365 randomly assigned to a diet and colonization treatment. There were three treatment groups: wild  
366 colonized/wild diet (Wild<sub>C</sub>/Wild<sub>D</sub>); wild colonized/domestic diet (Wild<sub>C</sub>/Dom<sub>D</sub>); or PBS  
367 gavage/wild diet (PBS<sub>C</sub>/Wild<sub>D</sub>). The latter served as a colonization control, emulating the  
368 Dom<sub>G</sub>/Wild<sub>D</sub> group from the reciprocal diet mouse experiment.

369  
370 On the first day of study, fecal samples were collected from each mouse and the mice were weighed  
371 before colonization. For mice receiving a wild microbiota, we experimentally colonized them with  
372 cecal contents collected from one randomly selected Wild<sub>G</sub>/Wild<sub>D</sub> individual in the wild/laboratory  
373 experiment (see above). The cecal contents were prepared following (21). In short, frozen cecal  
374 contents were resuspended in reduced PBS (1:1 g:ml) under anaerobic conditions then diluted  
375 1:30. Each recipient mouse received a single dose of 100 to 150ul cecal solution via oral gavage.  
376 PBS control mice received 100 to 150ul reduced PBS via oral gavage.

377  
378 Following gavage, mice were transferred to single housing in new, clean cages with the treatment  
379 diet present. Mice receiving domestic diet were provided ad libitum mouse chow (Prolab Isopro  
380 RMH 3000) in hanging food hoppers. Wild mouse diet consisted of a mix of bird seed (Wagner's  
381 Eastern Regional Blend Deluxe Wild Bird Food) and freeze-dried mealworms (Table S1), which  
382 was provided in excess of predicted consumption and placed in the corncob bedding to simulate  
383 foraging. All mice were provided with nesting material and plastic enrichment housing atop  
384 corncob bedding.

385

386 Additional fecal samples and weights were collected on days 1, 2, and 8 following gavage. After  
387 weights and fecal samples were collected on day 8, mice were humanely sacrificed via CO<sub>2</sub>  
388 euthanasia. At the end of the experiment, cage material was collected and sifted to quantify uneaten  
389 food (Wild<sub>D</sub>) and total weekly fecal production (all groups).

390

391 *Wolf/dog reciprocal diet experiment*

392 Ten wolves (*Canis lupus*) and nine dogs (*Canis familiaris*) participated in the study. Wild-caught  
393 or captive born wolves lived in packs ranging in size from 2-6 at the Wildlife Science Center  
394 (WSC; Stacy, MN). They were exposed to natural light cycles and weather conditions, with access  
395 to shelters and wolf-dug dens in their enclosures. Wolves had ad libitum access to water. Dogs  
396 enrolled in this study were privately owned and were recruited to participate through their owners.  
397 Dogs were kept in their typical environment throughout the experiment. All canid experimentation  
398 was approved by the WSC IACUC (protocol number HAR-001). Wolves were enrolled in the  
399 study from Dec. 5 – Dec. 20 2018; dogs from Dec. 24 2018 – Jan. 8 2019.

400

401 Every day of the study, animals were given inert glass beads via treats (~15g raw meatballs for  
402 wolves). The beads can be passed naturally without harm to the animal and allowed for source  
403 identification for fecal samples in cohoused animals. Fecal samples were collected daily in a sterile  
404 manner then moved to -20°C storage before long-term storage at -80°C. For the first week of the  
405 experiment all animals received a control diet that matched their genetic background (Table S1)—  
406 raw chicken parts (4lbs/animal) for wolves (Wild<sub>G</sub>/Wild<sub>D</sub>) and commercial dog food (Nutrisource  
407 Lamb Meal and Peas Grain Free) for dogs (Dom<sub>G</sub>/Dom<sub>D</sub>). Fecal samples were collected at least  
408 once daily from wolf enclosures and the dogs' home environments without handling the animals.  
409 On day 8, wolves were provided no new food, but were able to complete consumption of

410 previously provided diet materials. Fecal samples collected on this day were considered baseline  
411 samples for the next arm of the experiment. Beginning on day 8, a week of reciprocal diet feeding  
412 was commenced. During this period, wolves were fed commercial dog food (Wild<sub>G</sub>/Dom<sub>D</sub>) and  
413 dogs were fed raw chicken parts (Dom<sub>G</sub>/Wild<sub>D</sub>); glass beads continued to be administered via treats  
414 thus wolves received small amounts (~15g) of raw meat daily. Daily fecal samples were again  
415 collected. Following completion of the study, animals were returned to their standard diet.

416

### 417 16S rRNA gene analysis

#### 418 *Extraction*

419 Following collection during observational or experimental animal work, fecal samples were  
420 temporarily stored at -20°C then moved to -80°C for long term storage. Individual mouse pellets  
421 or approximately 0.1g feces were used for DNA extraction using the E.Z.N.A. Soil DNA Kit  
422 (Omega) following manufacturer's instructions.

423

#### 424 *Sequencing*

425 We performed 16S rRNA gene amplicon sequencing on fecal samples to determine gut microbial  
426 community structure. We used custom barcoded primers (35) targeting the 515F to 806Rb region  
427 of the 16S rRNA gene following published protocols (35-37). Sequencing was conducted on an  
428 Illumina HiSeq with single end 150bp reads in the Bauer Core Facility at Harvard University. Data  
429 was processed using Qiime1.8 commands for closed reference OTU picking with 97% similarity.  
430 Microbial taxonomy was assigned in reference to the GreenGenes database. We obtained  
431  $158611 \pm 109567$  assigned reads per sample.

432

#### 433 *qPCR*

434 To estimate total bacterial load, quantitative PCR (qPCR) was performed on fecal DNA using the  
435 same primers as used for sequencing. qPCR assays were run using PerfeCTa SYBR Green  
436 SuperMix Reaction Mix (QuantaBio) on a BioRad CFX384 Touch (Applied Biosystems, Foster  
437 City, CA) in the Bauer Core Facility at Harvard University. Cycle-threshold values were  
438 standardized against a dilution curve of known concentration and then adjusted for the weight of  
439 fecal matter extracted.

440

#### 441 Statistical analyses

442 All statistical analyses were carried out in R (R core team, ver. 3.3). Alpha-diversity (Shannon  
443 index, OTU richness) and beta-diversity (Bray-Curtis) metrics were calculated using the vegan  
444 package (38). All statistical tests performed were non-parametric. Permutational MANOVA  
445 (PERMANOVA) was carried out with the adonis function in vegan. Variability in a species'  
446 microbial community composition was calculated with the permutest and betadisper functions in  
447 vegan. For changes in phylum-level abundance, relative abundance data were multiplied by  
448 bacterial load measurements; a Bonferroni correction for multiple hypothesis correction was then  
449 applied to all test results. Phyla were included if they had an average abundance of at least 0.01%  
450 across all samples.

451

452 Potential human pathogens were identified following published methods (39, 40). In short, we  
453 obtained a list of potential human pathogens, compiled by Kembel and colleagues (39), then  
454 manually compared that list to the taxa identified to genus or species level in analysis. A subset of  
455 the data containing only these species was then analyzed for diversity with the same methods used  
456 for the total dataset.

457

458 To determine the consistency of gut microbial shifts with domestication or industrialization in  
459 the observational study, we calculated the average of the species pair (e.g., pig/boar) for axis 1  
460 and axis 2 of the NMDS then measured the shift along each axis for an individual sample and  
461 tested for differences by domestication status. To estimate the direction and magnitude of  
462 changes in beta-diversity during the experimental studies, we calculated the distance along axis 1  
463 or 2 of the NMDS relative to a baseline sample for that individual. We estimated the direction  
464 and magnitude of dissimilarity from the expected community composition (donor microbial  
465 community in gavage experiment; baseline species average for Dom<sub>G</sub>/Dom<sub>D</sub> or Wild<sub>G</sub>/Wild<sub>D</sub> in  
466 diet experiments) as the length of the vector through the first two axes of ordination space.

467

468 **Acknowledgments:** We thank many collaborators for help in collecting wild and domestic  
469 animal fecal samples, including Gwynne Durham and the Mountain School (cattle, pigs, sheep);  
470 Luina Greine Farm (alpaca); Steve Ditchkoff (wild boar); Jason Munshi-South and Matthew  
471 Combs (rats); Pedro Monterroso, Marisa Rodrigues, and Marketa Zimova (European rabbits);  
472 Margaret Gruen and Kyle Smith (dogs, wolves); Kevin Monteith (Bighorn sheep); J. Scott  
473 Weese (bison); Cristián Bonacic (vicuña); Bridget Alex, Nicholas Holowka, Irene Li, Daniel  
474 Lieberman, Mark Omura, and Antonia Prescott (wild mice). For help in collecting wild  
475 chimpanzee samples we thank Richard Wrangham, Zarin Machanda, Martin Muller, Emily Otali,  
476 and the staff of Kibale Chimpanzee Project. For assistance in carrying out experiments we thank  
477 Cary Allen-Blevins, Rachel Berg, Andy Biewener, Meg Callahan-Beckel, Brian Hare, Kathleen  
478 Pritchett-Corning, Pedro Ramirez, Laura Schell, and Emily Venable. For sequencing assistance  
479 we thank Christian Daly, Claire Reardon, and The Bauer Core Facility. For helpful comments on  
480 the manuscript we thank Daniel Lieberman, Richard Wrangham, and members of the Carmody  
481 lab. **Funding:** This work was supported by the Harvard Dean's Competitive Fund for Promising

482 Scholarship, William F. Milton Fund, and the National Institute on Aging and NIH Office for  
483 Research on Women's Health (R01AG049395). **Author contributions:** A.T.R. designed the  
484 study, conducted analyses, and wrote the manuscript; K.S.C., C.E.D., M.B., P.C., and R.R.  
485 performed experiments and edited the manuscript; M.E.T. provided samples and edited the  
486 manuscript; R.N.C designed the study and wrote the manuscript. **Competing interests:** The  
487 authors declare no competing interests.

488

489

490

## References and Notes:

491

1. C. De Filippo *et al.*, Impact of diet in shaping gut microbiota revealed by a comparative study in children from Europe and rural Africa. *PNAS* **107**, 14691-14696 (2010).

492

493

2. A. H. Moeller *et al.*, Rapid changes in the gut microbiome during human evolution. *PNAS* **111**, 16431-16435 (2014).

494

495

3. A. H. Moeller, The shrinking human gut microbiome. *Curr Opin Microbiol* **38**, 30-35 (2017).

496

497

4. S. A. Smits *et al.*, Seasonal cycling in the gut microbiome of the Hadza hunter-gatherers of Tanzania. *Science* **357**, 802-806 (2017).

498

499

5. R. E. Ley, P. J. Turnbaugh, S. Klein, J. I. Gordon, Microbial ecology: human gut microbes associated with obesity. *Nature* **444**, 1022-1023 (2006).

500

501

6. L. M. Cox *et al.*, Altering the intestinal microbiota during a critical developmental window has lasting metabolic consequences. *Cell* **158**, 705-721 (2014).

502

503

7. N. Kamada, S. U. Seo, G. Y. Chen, G. Nunez, Role of the gut microbiota in immunity and inflammatory disease. *Nature Rev Immunol* **13**, 321-335 (2013).

504

505

8. M. A. Zeder, The domestication of animals. *J Anthropol Res* **68**, 161-190 (2012).

506

9. C. Theofanopoulou *et al.*, Self-domestication in Homo sapiens: Insights from comparative genomics. *PLoS ONE* **12**, e0185306 (2017).

507

508

10. L. A. David *et al.*, Diet rapidly and reproducibly alters the human gut microbiome. *Nature* **505**, 559-563 (2014).

509

510

11. R. N. Carmody *et al.*, Diet dominates host genotype in shaping the murine gut microbiota. *Cell Host Microbe* **17**, 72-84 (2015).

511

512

12. J. M. Allen *et al.*, Exercise alters gut microbiota composition and function in lean and obese humans. *Med Sci Sports Exer* **50**, 747-757 (2018).

513

- 514 13. E. V. Lamoureux, S. A. Grandy, M. G. I. Langille, Moderate exercise has limited but  
515 distinguishable effects on the mouse microbiome. *mSystems* **2**, e00006-00017 (2017).
- 516 14. K. A. Dill-McFarland *et al.*, Close social relationships correlate with human gut microbiota  
517 composition. *Sci Rep* **9**, 703 (2019).
- 518 15. R. E. Antwis, J. M. D. Lea, B. Unwin, S. Shultz, Gut microbiome composition is associated  
519 with spatial structuring and social interactions in semi-feral Welsh Mountain ponies.  
520 *Microbiome* **6**, 207 (2018).
- 521 16. N. A. Bokulich *et al.*, Antibiotics, birth mode, and diet shape microbiome maturation  
522 during early life. *Sci Trans Med* **8**, 343ra382 (2016).
- 523 17. I. Cho *et al.*, Antibiotics in early life alter the murine colonic microbiome and adiposity.  
524 *Nature* **488**, 621-626 (2012).
- 525 18. C. Li *et al.*, Effect of early weaning on the intestinal microbiota and expression of genes  
526 related to barrier function in lambs. *Front Microbiol* **9**, 1431 (2018).
- 527 19. A. S. Wilkins, R. W. Wrangham, W. T. Fitch, The “domestication syndrome” in mammals:  
528 a unified explanation based on neural crest cell behavior and genetics. *Genetics* **197**, 795-  
529 808 (2014).
- 530 20. B. D. Muegge *et al.*, Diet drives convergence in gut microbiome functions across  
531 mammalian phylogeny and within humans. *Science* **332**, 970-974 (2011).
- 532 21. S. P. Rosshart *et al.*, Wild mouse gut microbiota promotes host fitness and improves  
533 disease resistance. *Cell* **171**, 1015-1028 (2017).
- 534 22. L. K. Beura *et al.*, Normalizing the environment recapitulates adult human immune traits  
535 in laboratory mice. *Nature* **532**, 512-516 (2016).
- 536 23. T. Yatsunenko *et al.*, Human gut microbiome viewed across age and geography. *Nature*  
537 **486**, 222-227 (2012).



- 538 24. S. J. Song *et al.*, Cohabiting family members share microbiota with one another and with  
539 their dogs. *eLife* **2**, e00458 (2013).
- 540 25. R. N. Carmody, in *Chimpanzees & Human Evolution*, M. N. Muller, R. W. Wrangham, D.  
541 R. Pilbeam, Eds. (Harvard University Press, Cambridge, MA, 2017), pp. 311-338.
- 542 26. E. D. Sonnenburg *et al.*, Diet-induced extinctions in the gut microbiota compound over  
543 generations. *Nature* **529**, 212-215 (2016).
- 544 27. E. Axelsson *et al.*, The genomic signature of dog domestication reveals adaptation to a  
545 starch-rich diet. *Nature* **495**, 360-364 (2013).
- 546 28. K. D. Kohl, R. B. Weiss, J. Cox, C. Dale, M. Denise Dearing, Gut microbes of mammalian  
547 herbivores facilitate intake of plant toxins. *Ecol Lett* **17**, 1238-1246 (2014).
- 548 29. M. G. Dominguez Bello, R. Knight, J. A. Gilbert, M. J. Blaser, Preserving microbial  
549 diversity. *Science* **362**, 33-34 (2018).
- 550 30. S. M. Hird, Evolutionary biology needs wild microbiomes. *Front Microbiol* **8**, 725 (2017).
- 551 31. A. Alberdi, O. Aizpurua, K. Bohmann, M. L. Zepeda-Mendoza, M. T. P. Gilbert, Do  
552 vertebrate gut metagenomes confer rapid ecological adaptation? *Trends Ecol Evol* **31**, 689-  
553 699 (2016).
- 554 32. M. Combs, E. E. Puckett, J. Richardson, D. Mims, J. Munshi-South, Spatial population  
555 genomics of the brown rat (*Rattus norvegicus*) in New York City. *Mol Ecol* **27**, 83-98  
556 (2018).
- 557 33. J. S. Weese, T. Shury, M. D. Jelinski, The fecal microbiota of semi-free-ranging wood  
558 bison (*Bison bison athabasca*). *BMC Vet Res* **10**, 120 (2014).
- 559 34. E. Schwarz, H. K. Schwarz, The wild and commensal stocks of the house mouse, *Mus*  
560 *musculus* Linnaeus. *J Mammal* **24**, 59-72 (1943).

- 561 35. J. G. Caporaso *et al.*, Global patterns of 16S rRNA diversity at a depth of millions of  
562 sequences per sample. *PNAS* **108**, 4516-4522 (2011).
- 563 36. J. G. Caporaso *et al.*, Ultra-high-throughput microbial community analysis on the Illumina  
564 HiSeq and MiSeq platforms. *ISME J* **6**, 1621-1624 (2012).
- 565 37. C. F. Maurice, H. J. Haiser, P. J. Turnbaugh, Xenobiotics shape the physiology and gene  
566 expression of the active human gut microbiome. *Cell* **152**, 39-50 (2013).
- 567 38. J. Oksanen *et al.* *vegan*: Community Ecology Package. R package version 2.4-2.  
568 <https://CRAN.R-project.org/package=vegan> (2017).
- 569 39. S. W. Kembel *et al.*, Architectural design influences the diversity and structure of the built  
570 environment microbiome. *ISME J* **6**, 1469-1479 (2012).
- 571 40. A. T. Reese *et al.*, Urban stress is associated with variation in microbial species  
572 composition—but not richness—in Manhattan. *ISME J* **10**, 751-760 (2016).

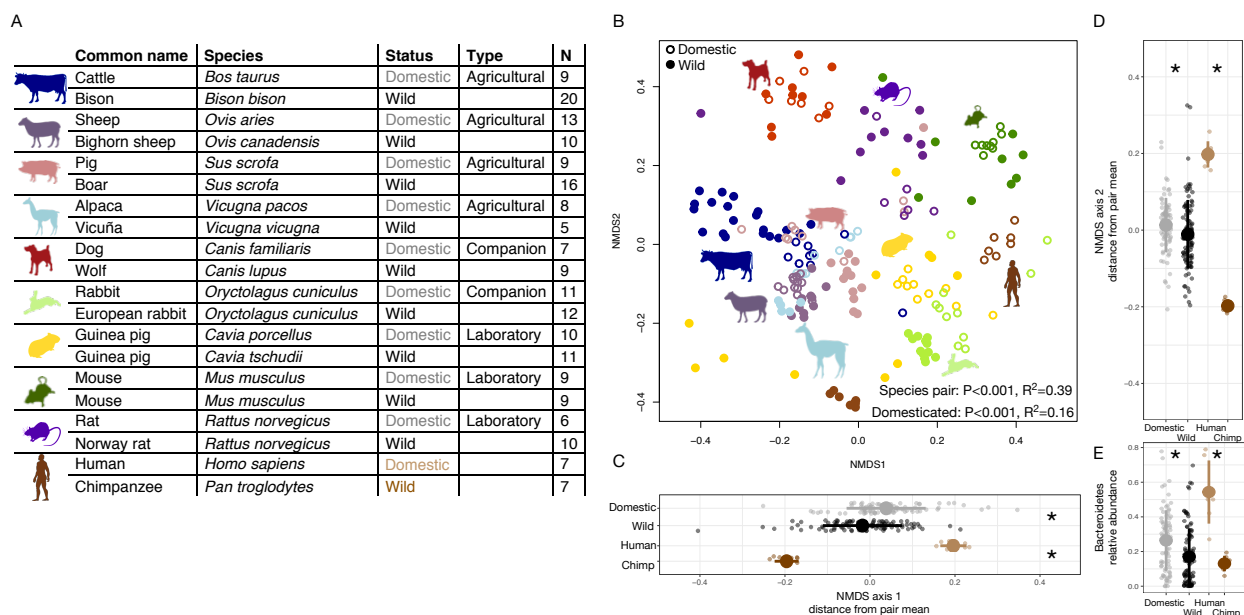

573  
574  
575  
576  
577  
578  
579  
580  
581  
582  
583

**Fig. 1.** The gut microbiota of wild and domestic mammals differ consistently and in a manner recapitulating differences between industrialized humans and chimpanzees. **(A)** Sampling scheme for cross-species study. **(B)** Nonmetric multidimensional scaling (NMDS) ordination of Bray-Curtis dissimilarities illustrates a significant signal of domestication (closed versus open circles) and clustering by species pair (color). **(C)** Individual shifts relative to species-pair mean along the first NMDS axis differ by domestication status. **(D)** Individual shifts relative to species-pair mean along the second NMDS axis differ by domestication status. **(E)** Relative abundance of the bacterial phylum Bacteroidetes differs by domestication status. Asterisks in (C-E) indicate  $P<0.05$  Mann-Whitney U test by domestication status for animals or by species for human/chimpanzees. Large circles are means; bars show standard deviations.

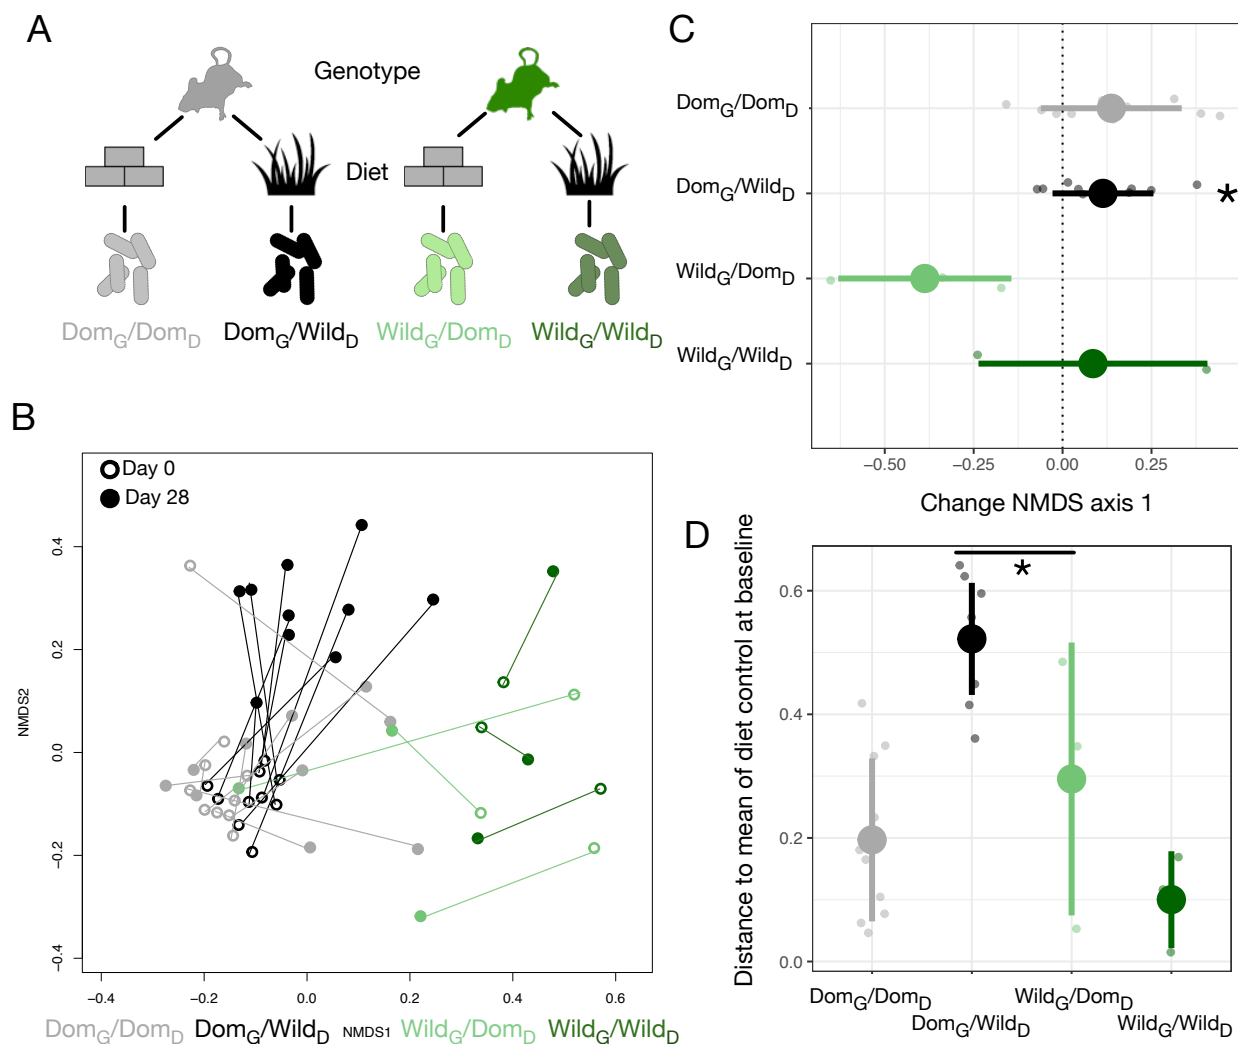

584  
585  
586  
587  
588  
589  
590  
591  
592  
593

**Fig. 2.** Microbial differences between wild and domestic mice can be overcome by diet shifts. **(A)** Design scheme for genotype/diet factorial mouse experiment. **(B)** Nonmetric multidimensional scaling (NMDS) ordination of Bray-Curtis dissimilarities showing changes for mice from day 0 (open circle) to day 28 (closed circle) by experimental groups (color). **(C)** Animals on reciprocal diets (Dom<sub>G</sub>/Wild<sub>D</sub> and Wild<sub>G</sub>/Dom<sub>D</sub>) move in opposite directions along NMDS axis 1 from day 0 to day 28. Asterisk indicates P<0.05 one-sample Wilcoxon test. Dashed line indicates a shift of 0. **(D)** At the end of the experiment, distance to the mean of the diet control at baseline (Dom<sub>G</sub>/Dom<sub>D</sub> and Wild<sub>G</sub>/Wild<sub>D</sub>) was lower for wild mice than lab mice. Asterisk indicates P<0.05 Mann-Whitney U test. Large circles are means; bars show standard deviations.

594  
595

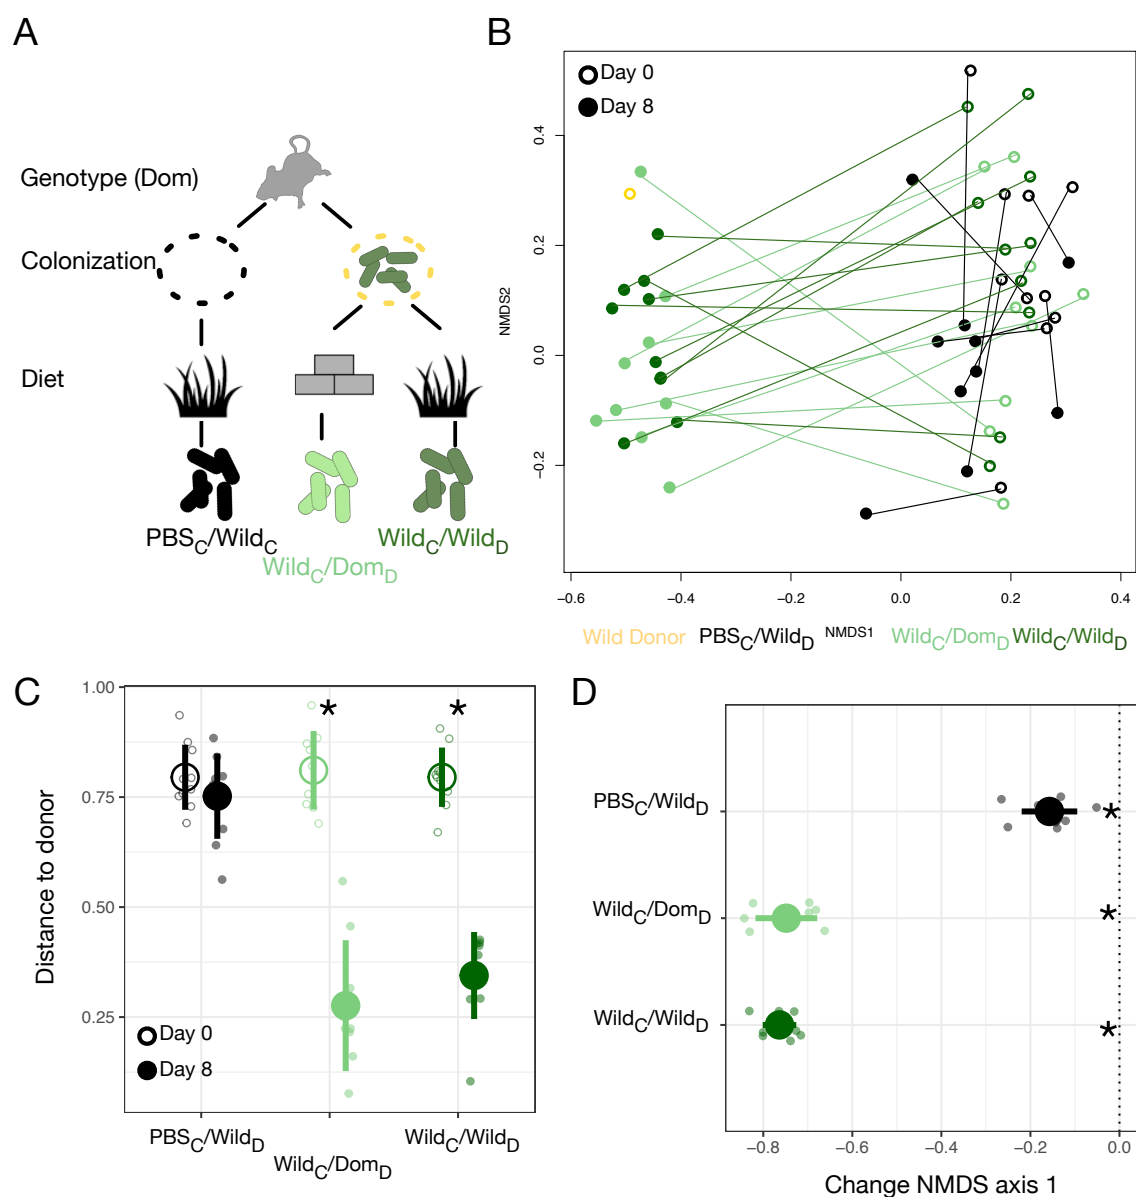

596  
597  
598  
599  
600  
601  
602  
603  
604  
605  
606

**Fig. 3.** Laboratory mice can be re-wilded through colonization with wild microbial community. (A) Design scheme for colonization/diet mouse experiment. (B) Nonmetric multidimensional scaling (NMDS) ordination of Bray-Curtis dissimilarities showing changes for mice from day 0 (open circles) to day 8 (closed circles) by experimental groups (color). (C-D) At the end of the experiment (closed circle), distance to the wild community donor decreased most in animals colonized with wild communities (Wild<sub>C</sub>/Dom<sub>D</sub> and Wild<sub>C</sub>/Wild<sub>D</sub>; C), but all experimental groups exhibited change along NMDS axis 1 (D) during the course of the experiment. Asterisks in (C) indicate P<0.05 Mann-Whitney U test comparing day 0 to day 8 for each experimental group. Asterisks in (D) indicate P<0.05 one-sample Wilcoxon test, and dashed line indicates a shift of 0. Large circles are means; bars show standard deviations.

607  
608

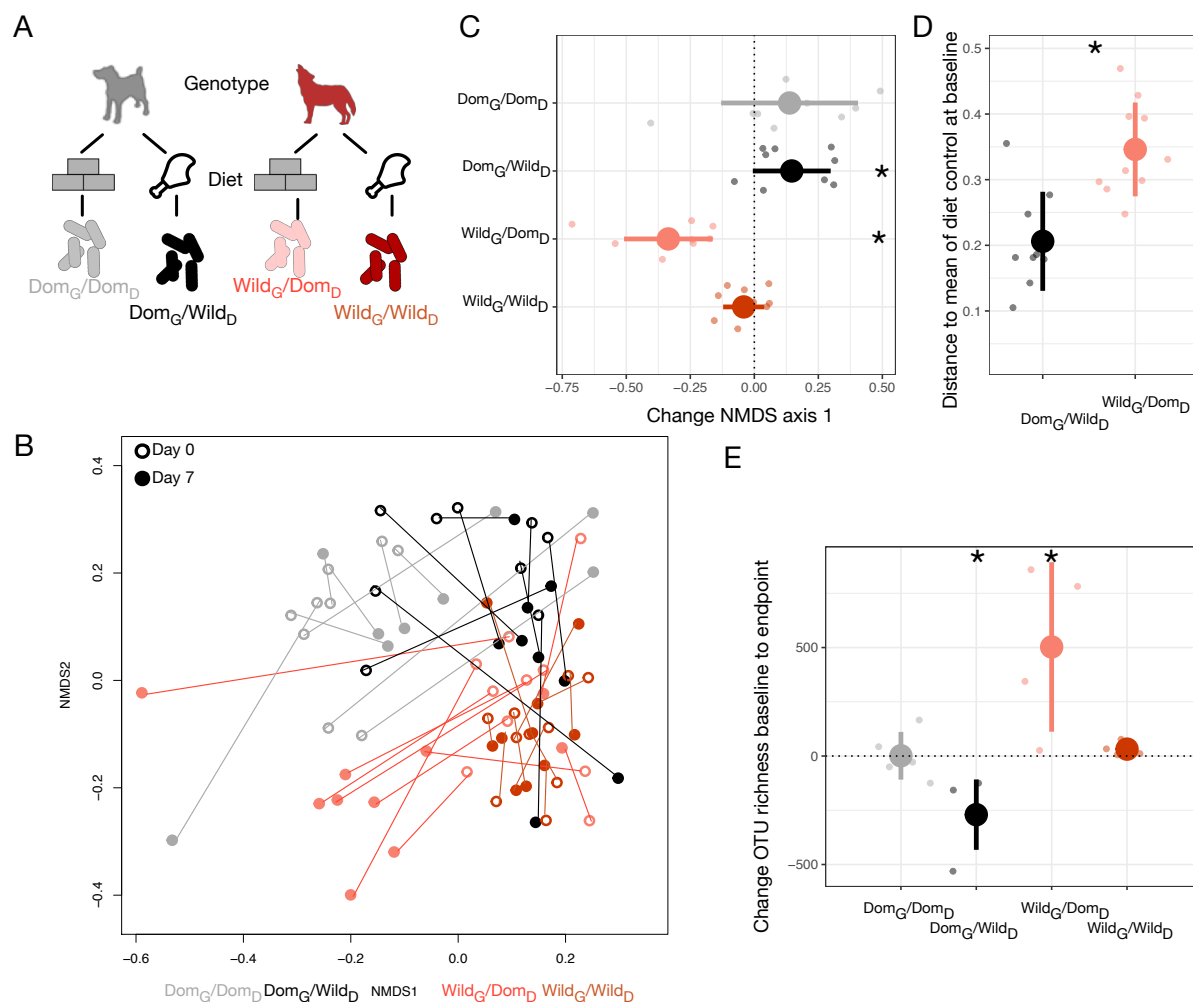

609  
610  
611  
612  
613  
614  
615  
616  
617  
618  
619  
620  
621

**Fig. 4.** Microbial differences between wild and domestic canids were overcome by diet shifts, as in mice. (A) Design scheme for genotype/diet canid experiment. (B) Nonmetric multidimensional scaling (NMDS) ordination of Bray-Curtis dissimilarities showing changes for canids from day 0 (open circle) to day 7 (closed circle) by experimental groups (color). (C) Canids on reciprocal diets (Dom<sub>G</sub>/Wild<sub>D</sub> and Wild<sub>G</sub>/Dom<sub>D</sub>) moved in opposite directions along NMDS axis 1 over time. (D) At the end of the experiment, distance to the mean of diet controls at baseline (Dom<sub>G</sub>/Dom<sub>D</sub> and Wild<sub>G</sub>/Wild<sub>D</sub>) was lower for dogs than wolves on reciprocal diets. Asterisk indicates P<0.05 Mann-Whitney U test. (E) Change in OTU richness from day 0 to day 7 differed significantly from 0 in opposite directions for animals on reciprocal diets (Dom<sub>G</sub>/Wild<sub>D</sub> and Wild<sub>G</sub>/Dom<sub>D</sub>). Asterisks in (C, E) indicate P<0.05 one-sample Wilcoxon test, and dashed line indicates a shift of 0. Large circles are means; bars show standard deviations.

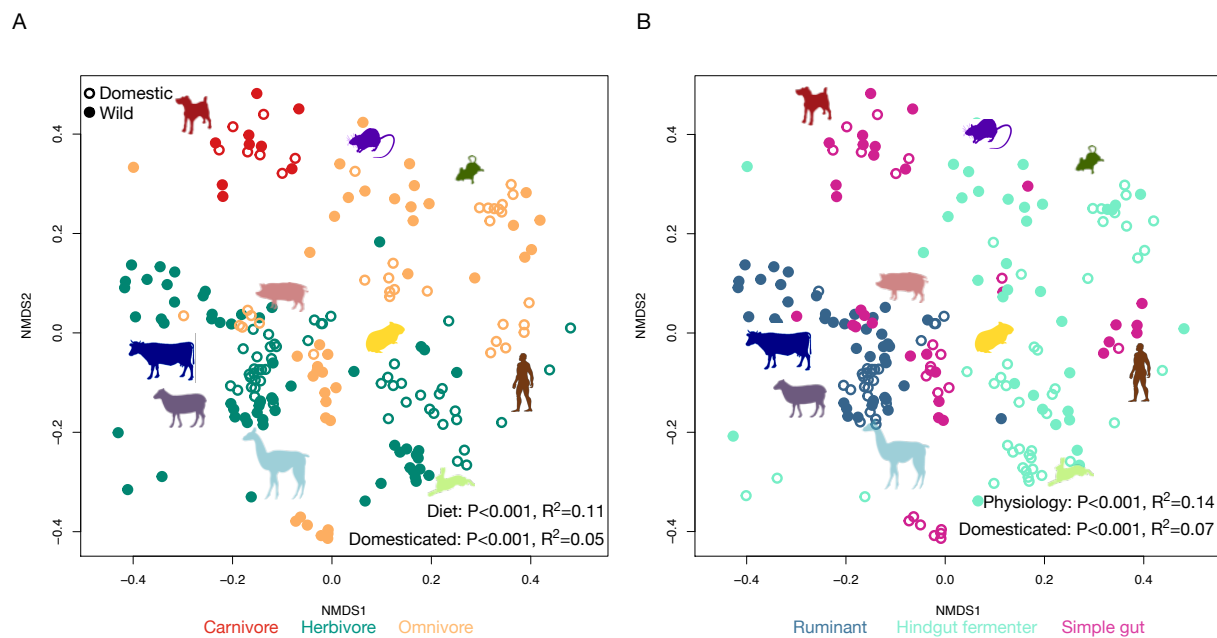

622  
623  
624  
625  
626  
627

**Fig. S1.**

Diet type (A) and digestive physiology (B) were associated with variation in gut microbial community composition amongst wild (closed circles) and domestic (open circles) mammals, visualized here with nonmetric multidimensional scaling of Bray-Curtis dissimilarity.

628

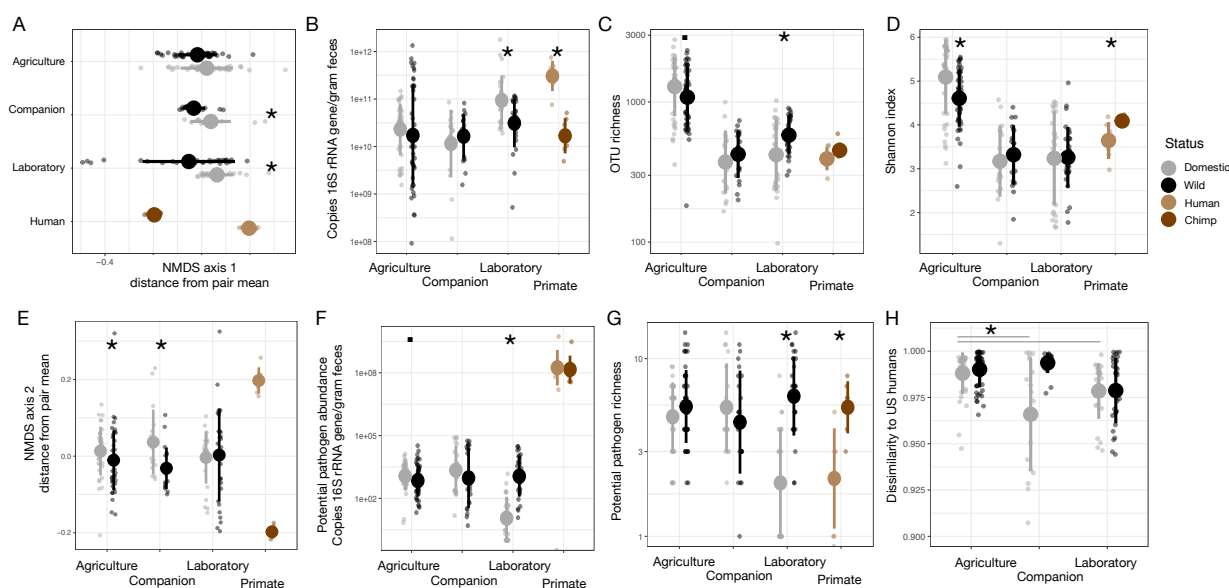

629

630

### Fig. S2.

631

632

633

634

635

636

637

Ordination axis shifts (A, E), microbial load (B), OTU richness (C), Shannon index (D), potential pathogen abundance (F), and potential pathogen richness (G) varied by domestication status for at least one domestication type (agriculture, companion, or laboratory) in cross-species dataset. Trends often mirrored those seen in comparing humans to chimpanzees. (H) Bray-Curtis dissimilarity to industrialized humans varied by domestication status and domestication type. Asterisks indicate  $P < 0.05$  and periods indicate  $P < 0.1$  Mann-Whitney U test.



638

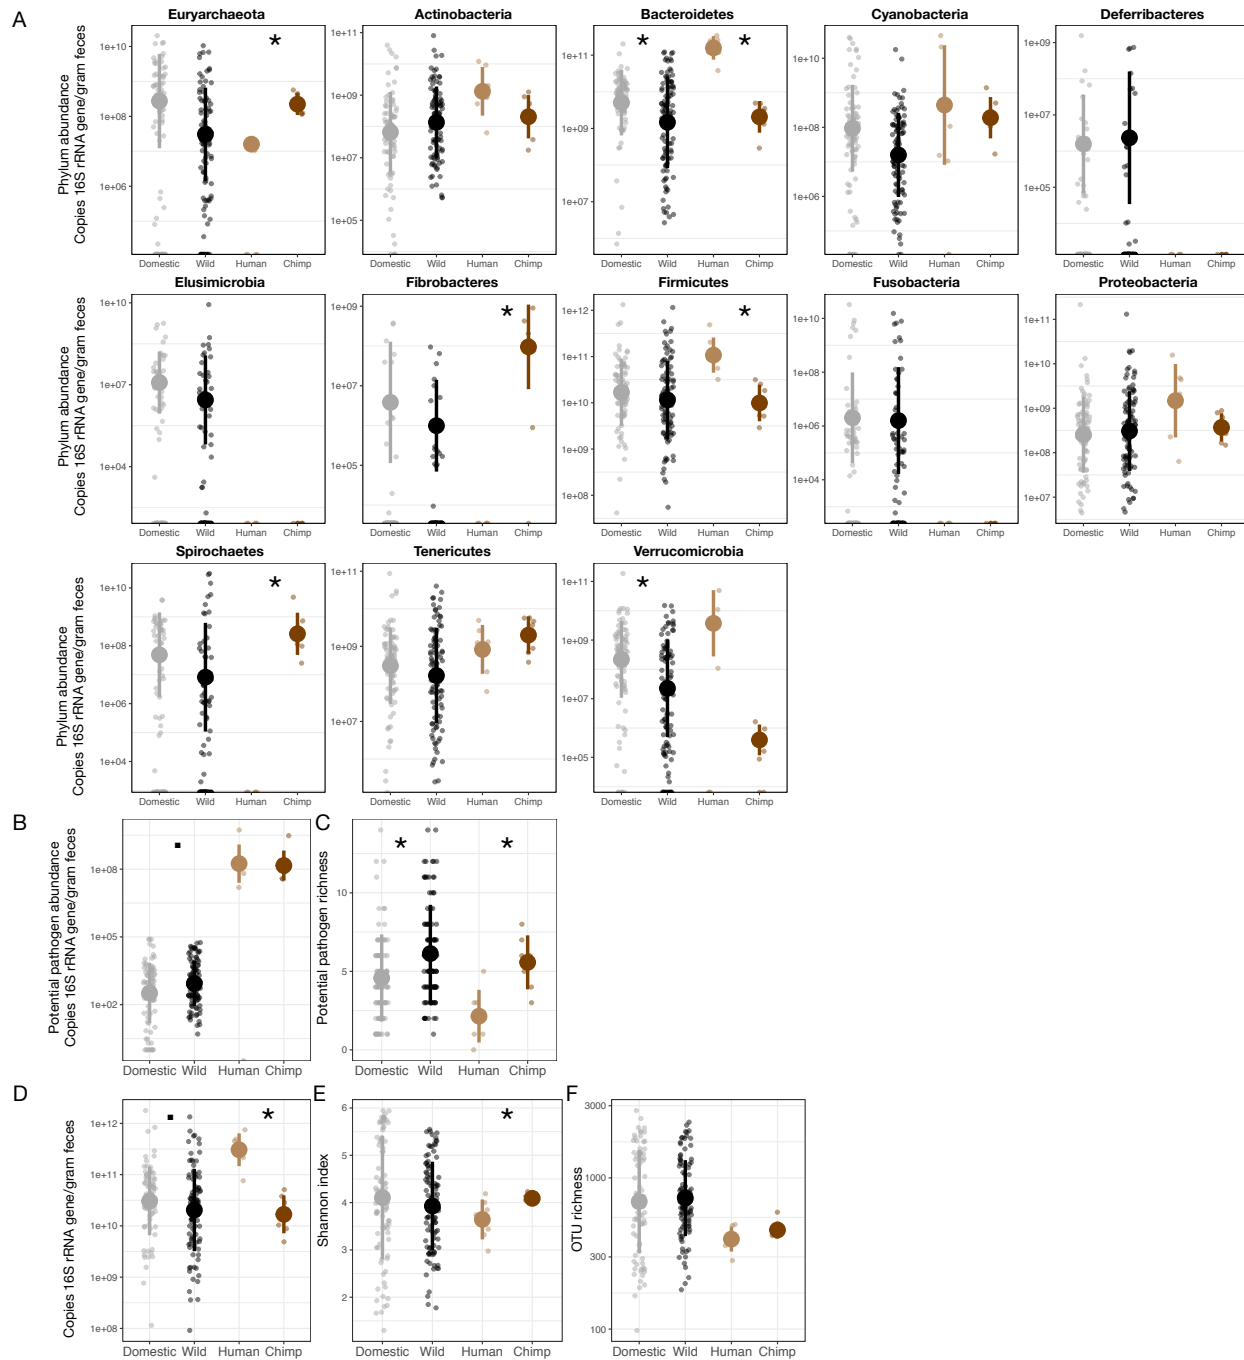

639

640

**Fig. S3.**

641

642

643

644

645

646

647

Some phylum abundances (A) and potential pathogen community characteristics (B, C) varied with domestication in our cross-species dataset. Microbial density (quantified as 16S rRNA gene copies per gram feces; D) and alpha-diversity metrics (Shannon index (E) and OTU richness (F)) did not vary consistently between wild and domestic animals. Asterisks indicate  $P < 0.05$  and periods indicate  $P < 0.1$  Mann-Whitney U test. Analyses by phylum included Bonferroni multiple hypothesis correction.

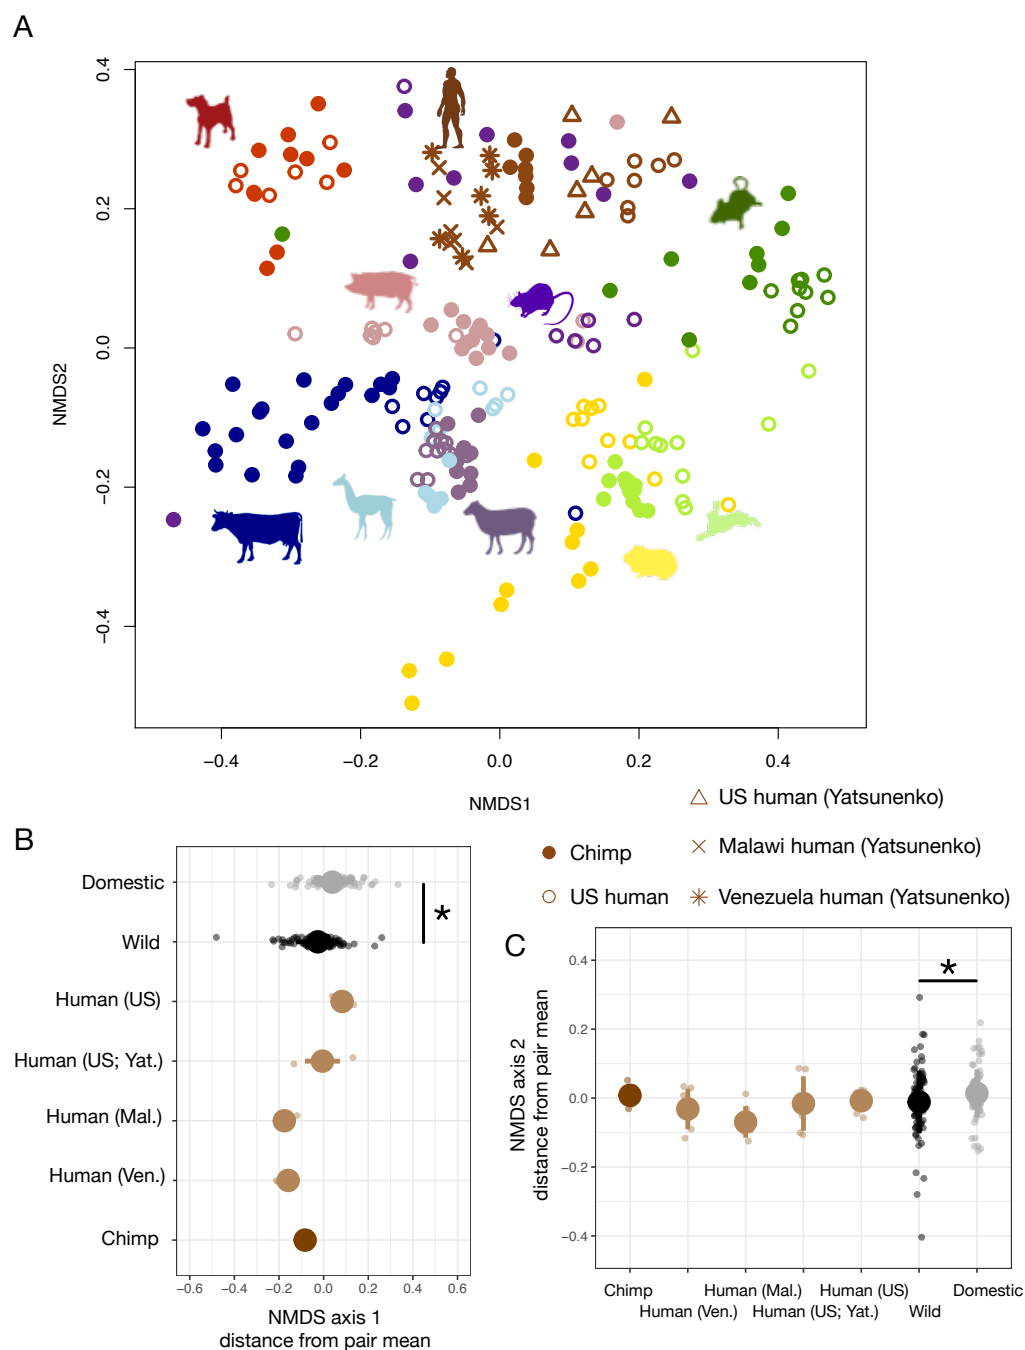

648

649

**Fig. S4.**

650

651

652

653

654

655

656

Inclusion of additional human gut microbiota samples shows that while humans and chimpanzees cluster relative to other animals (A), traditional human populations do not demonstrate the same shifts along nonmetric multidimensional scaling (NMDS) axis 1 (B) and 2 (C) as chimpanzees relative to industrialized humans or wild animals relative to domestic animals. NMDS calculated with Bray-Curtis dissimilarity. Asterisks indicate  $P < 0.05$  Mann-Whitney U test.

A

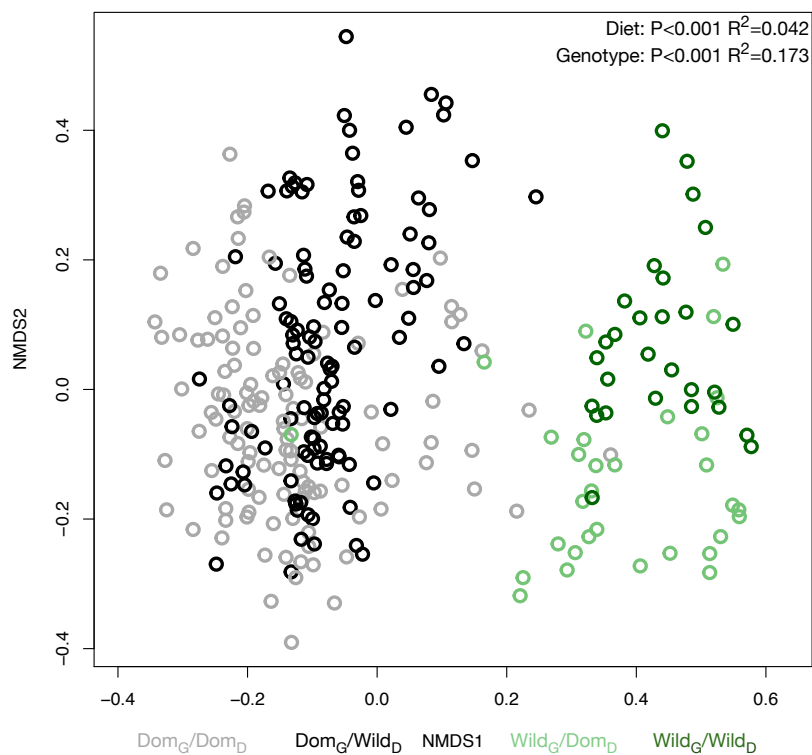

B

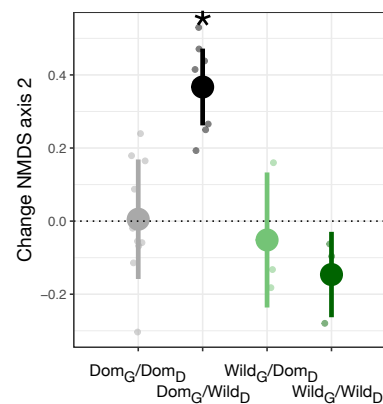

657  
658  
659  
660  
661  
662  
663

**Fig. S5.**

(A) Nonmetric multidimensional scaling (NMDS) of all time points illustrates significant effects of genotype and diet on Bray-Curtis dissimilarity. (B) Dom<sub>G</sub>/Wild<sub>D</sub> mice move significantly up along the second NMDS axis between day 0 and 28 of the experiment. Asterisk indicates P<0.05 one-sample Wilcoxon test.

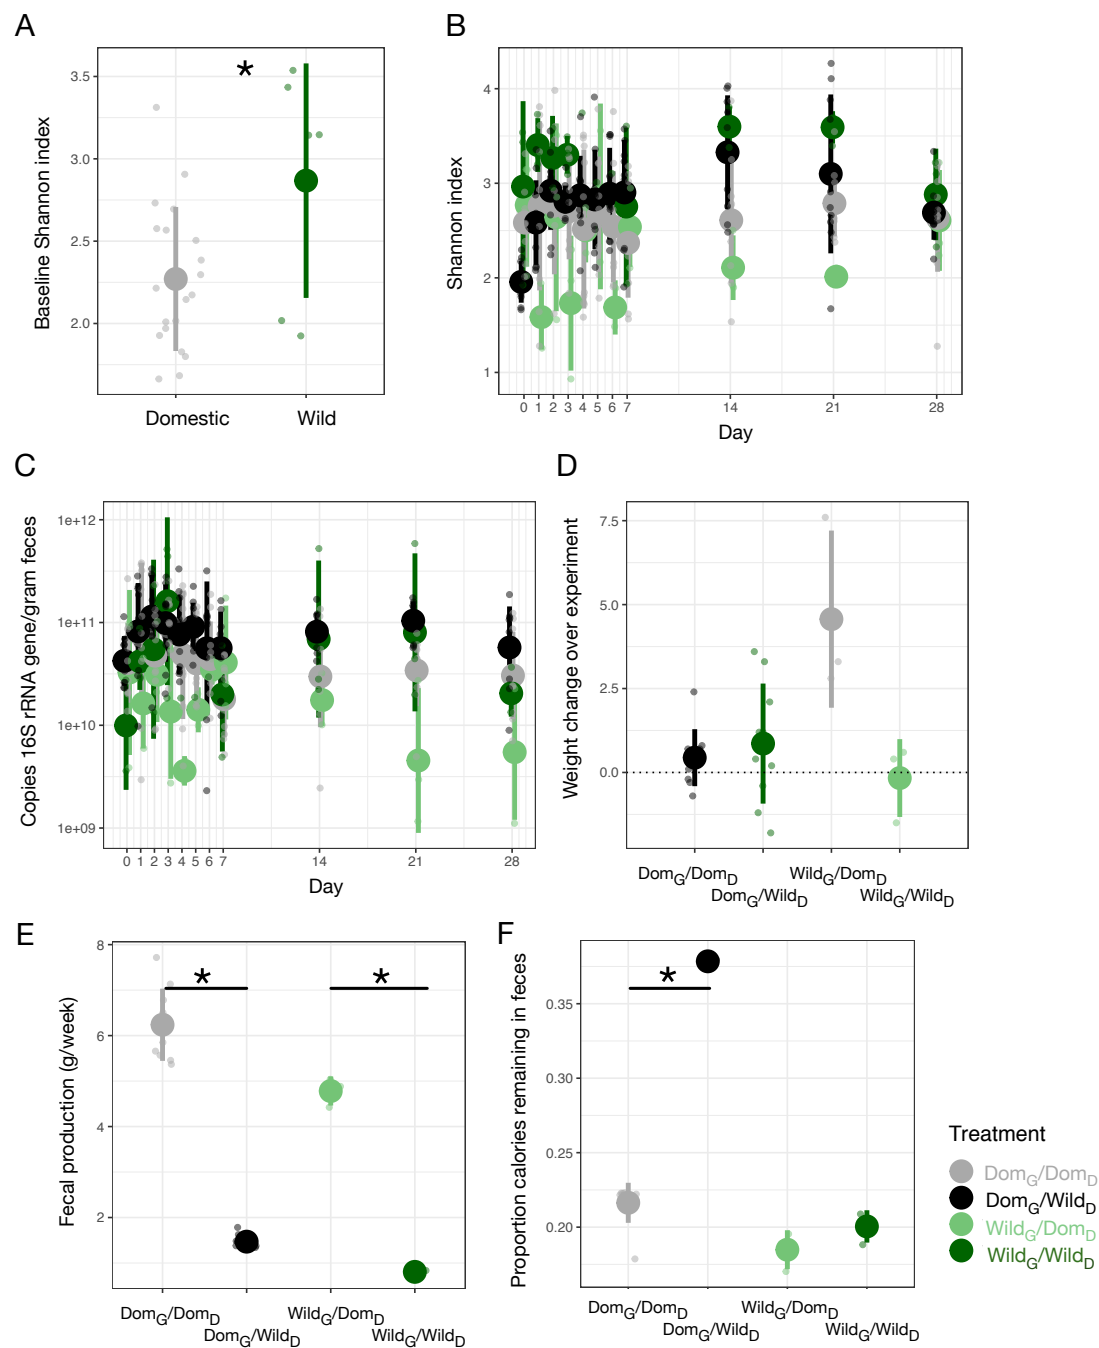

664

665

**Fig. S6.**

666 (A) Shannon index differed between genotypes on day 0. (B) Shannon index plotted by  
 667 experimental groups over time. (C) Microbial load (quantified as 16S rRNA gene copies per  
 668 gram feces) plotted by experimental groups over time. (D) Individual weight gain over the  
 669 course of the experiment was highest in Wild<sub>G</sub>/Dom<sub>D</sub> mice. (E) Total fecal production over one  
 670 week differed between experimental groups. (F) Calories remaining in feces as a function of  
 671 total calories consumed varied by diet in Dom<sub>G</sub> mice. Asterisks in (A, E, F) indicate P < 0.05  
 672 Mann-Whitney U test.

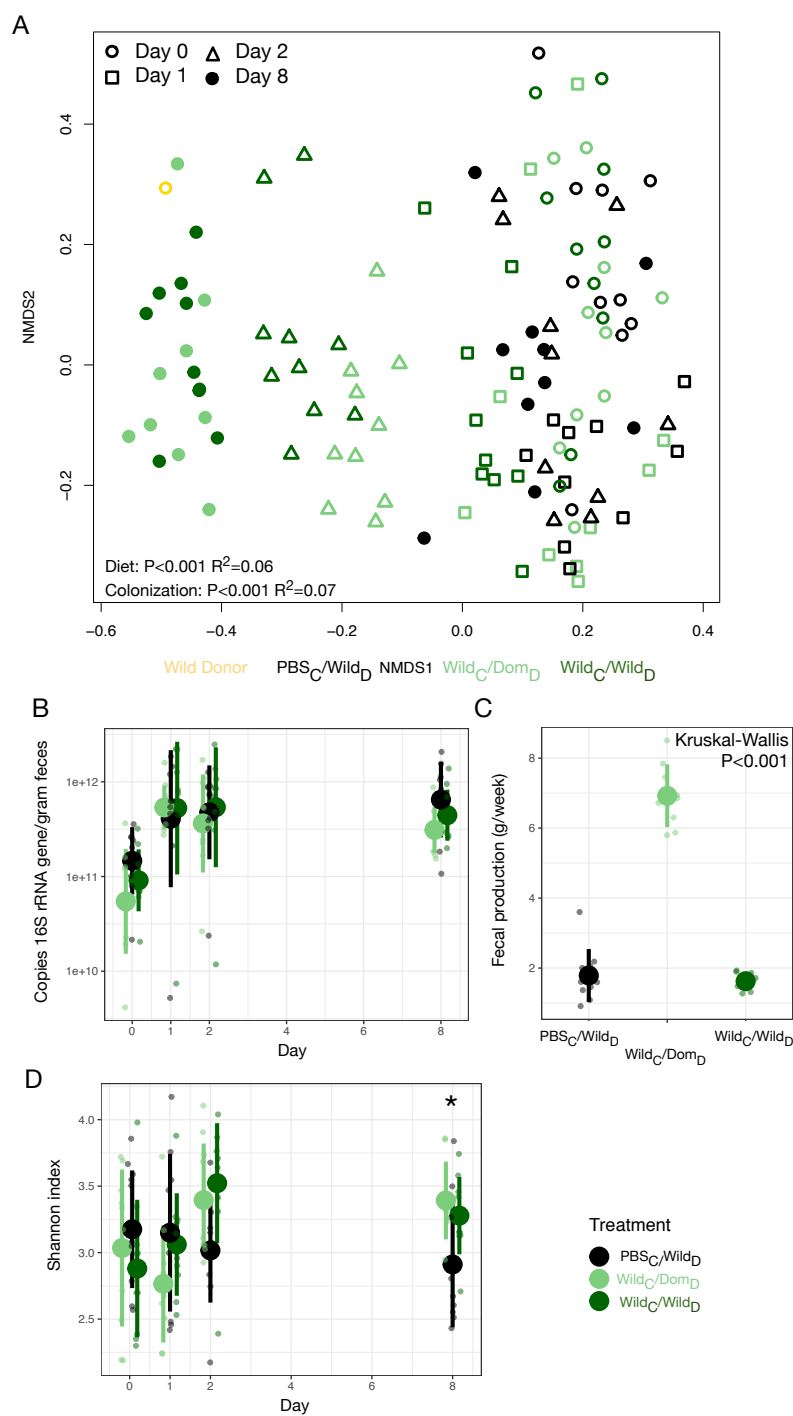

673

674

### Fig. S7.

675 (A) Nonmetric multidimensional scaling (NMDS) of all time points illustrated significant effects of colonization and  
676 diet treatment on Bray-Curtis dissimilarity. (B) Microbial load by experimental groups plotted over time. (C) Total  
677 fecal production over one week differed between experimental groups. (D) Shannon index plotted by experimental  
678 groups over time. Asterisks indicate  $P < 0.05$  Kruskal-Wallis test.

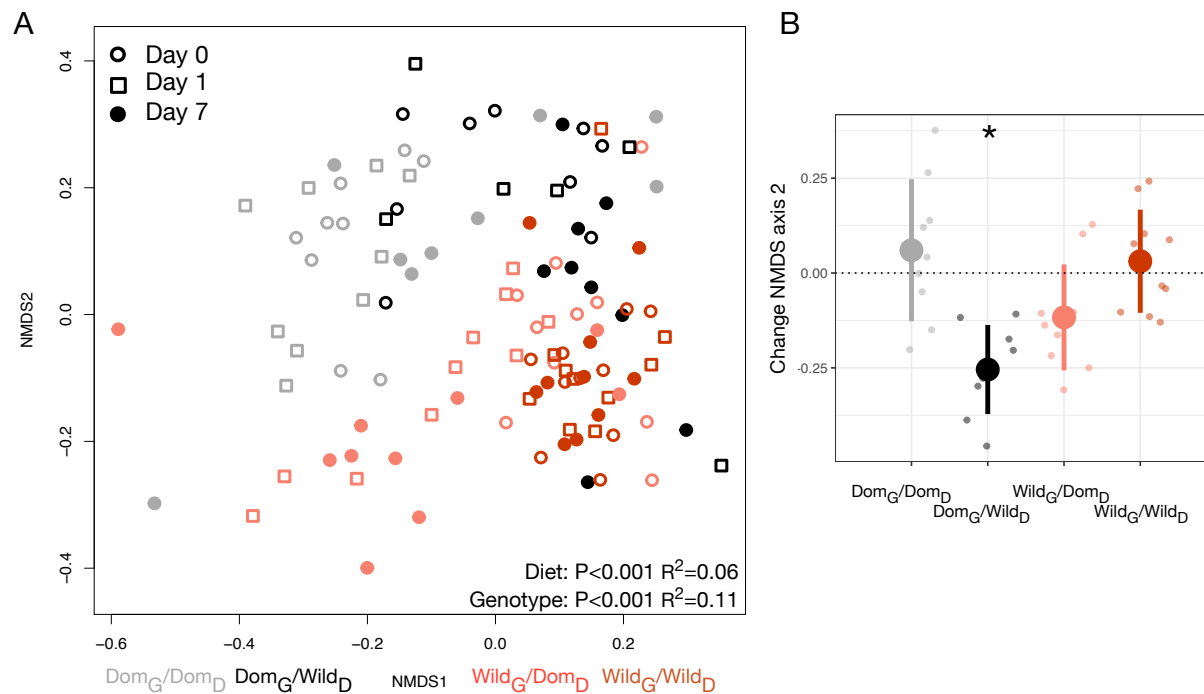

679

680

**Fig. S8.**

681

(A) Nonmetric multidimensional scaling (NMDS) of all time points illustrated significant effects

682

of genotype and diet on Bray-Curtis dissimilarity. (B) Dom<sub>G</sub>/Wild<sub>D</sub> canids moved significantly

683

down along the second NMDS axis between day 0 and 7 of the experiment. Asterisk indicates

684

$P < 0.05$  one-sample Wilcoxon test.

685

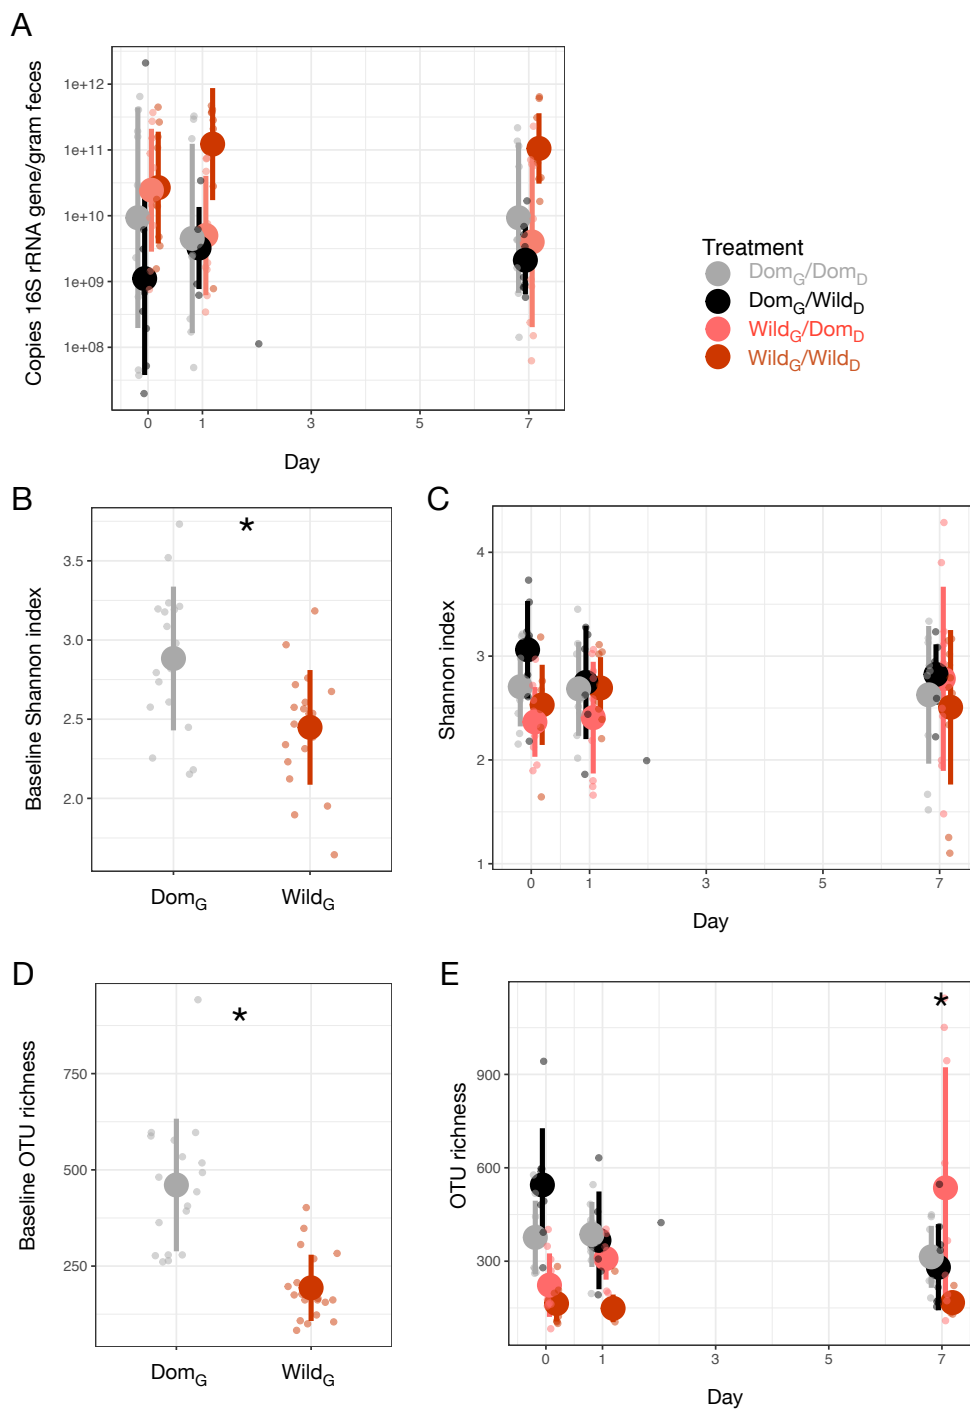

686

687

688

689

690

691

692

693

**Fig. S9.**

(A) Microbial load plotted by experimental groups over time. (B) Shannon index differed between genotypes on day 0. (C) Shannon index plotted by experimental groups over time. (D) OTU richness differed between genotypes on day 0. (E) OTU richness plotted by experimental groups over time. Asterisks for (B, D) indicate P<0.05 Mann-Whitney U test. Asterisk for (E) indicates P<0.05 Kruskal-Wallis test.

694  
695  
696

**Table S1.**  
Nutritional information for experimental diets.

|                        | Mouse                          |                   |      |                           | Canid       |                                                      |
|------------------------|--------------------------------|-------------------|------|---------------------------|-------------|------------------------------------------------------|
|                        | Wild diet                      |                   |      | Domestic diet             | Wild diet   | Domestic diet                                        |
|                        | Mealworms<br>(5% by<br>weight) | Birdseed<br>(95%) | Mix  | Prolab Isopro<br>RMH 3000 | Raw chicken | Nutrisource Lamb Meal<br>and Peas Grain Free<br>Diet |
| Crude Protein<br>(min) | 50.0                           | 9.0               | 11.1 | 22.0                      | 14.1        | 28.7                                                 |
| Crude Fat (min)        | 24.0                           | 4.0               | 5.0  | 5.0                       | 28.7        | 18.3                                                 |
| Crude Fiber (max)      | 9.5                            | 15.0              | 14.7 | 5.0                       | 0.0         | 3.7                                                  |
| Phosphorus (min)       | 0.5                            |                   |      | 0.8                       | 0.8         | 1.2                                                  |
| Moisture (max)         | 10.0                           | 13.0              | 12.9 | 10.0                      |             | 9.5                                                  |
| Calories/gram          |                                |                   | 5143 | 4136                      | 3190        | 4088                                                 |

697
